# Supplementary material for: Gating ion and fluid transport with chiral solvent
Source: Royal Society of Chemistry journal article supplement (doi:10.1039/d3fd00063j), 2023-01-01
Supplement: d3fd00063j1.pdf [file d3fd00063j1.pdf]

## Supplementary Information

### Gating Ion and Fluid Transport with Chiral Solvent

Savannah Silva,<sup>1,\*</sup> Siddharth Singh,<sup>2\*</sup> Ethan Cao,<sup>1</sup> John T. Fourkas,<sup>2,3</sup> Zuzanna S. Siwy<sup>1,4,5</sup>

<sup>1</sup>*Department of Physics and Astronomy, University of California, Irvine, CA 92697, USA*

<sup>2</sup>*Department of Chemistry and Biochemistry, <sup>3</sup>Institute for Physical Science and Technology, University of Maryland, College Park, Maryland, USA*

<sup>4</sup>*Department of Chemistry, <sup>5</sup>Department of Biomedical Engineering, University of California, Irvine, CA 92697, USA*

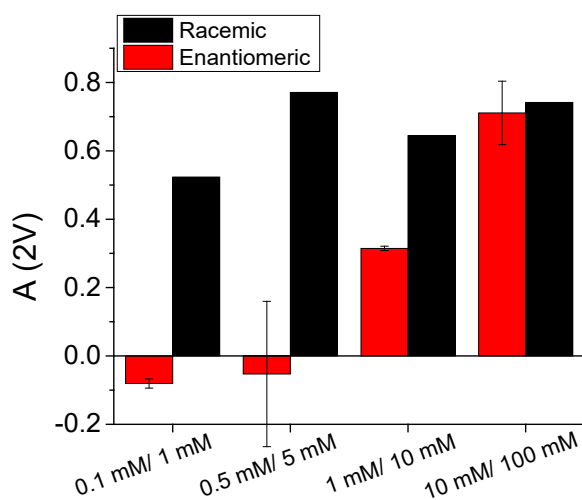

**Figure S1.** Ion current anisotropy,  $A$ , defined in eq. (1) of the main manuscript for a single PET polymer pore with an opening of 370 nm.

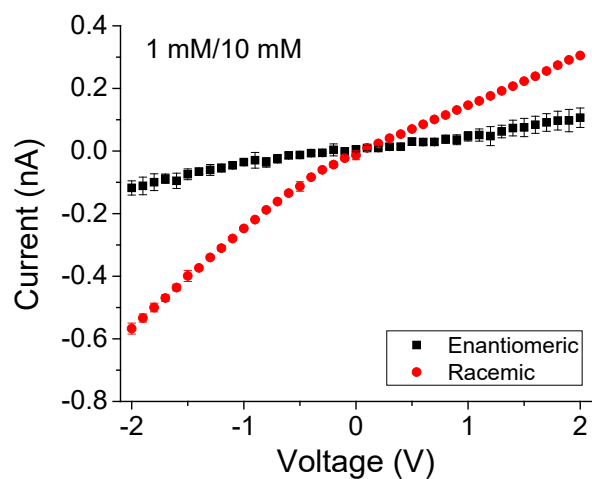

**Figure S2.** Current-voltage curves for a 30 nm in diameter silicon nitride pore, designated as O3, recorded in the  $\text{LiClO}_4$  concentration gradient of 1 mM/10 mM prepared in racemic and enantiomeric solutions. Note, the large difference in ion current magnitudes for the racemic and enantiomeric solutions. We do not have yet explanation for this effect.
